# Supplementary material for: Oxytetracycline Persistence in Uterine Secretion after Intrauterine Administration in Cows with Metritis
Source: MDPI journal article supplement (doi:10.3390/ani12151922), 2022-07-28
Supplement: s1 [file s1]

**Table S1.** Measured individual concentrations of oxytetracycline in plasma and milk ( $n = 6$ ) after the third intrauterine dose (8 mg/kg) of 10% solution of oxytetracycline.

| Time (h) | Cow 1 ( $\mu\text{g mL}^{-1}$ ) | Cow 2 ( $\mu\text{g mL}^{-1}$ ) | Cow 3 ( $\mu\text{g mL}^{-1}$ ) | Cow 4 ( $\mu\text{g mL}^{-1}$ ) | Cow 5 ( $\mu\text{g mL}^{-1}$ ) | Cow 6 ( $\mu\text{g mL}^{-1}$ ) |
|----------|---------------------------------|---------------------------------|---------------------------------|---------------------------------|---------------------------------|---------------------------------|
| Plasma   |                                 |                                 |                                 |                                 |                                 |                                 |
| 0.5      | 0.057                           | <LOQ                            | 0.091                           | 0.074                           | 0.277                           | 0.038                           |
| 1        | 0.051                           | 0.022                           | 0.098                           | 0.066                           | 0.163                           | 0.101                           |
| 3        | 0.044                           | <LOQ                            | 0.109                           | 0.063                           | 0.098                           | 0.058                           |
| 6        | 0.039                           | <LOQ                            | 0.089                           | 0.052                           | 0.084                           | 0.056                           |
| 9        | 0.033                           | <LOQ                            | 0.080                           | 0.046                           | 0.077                           | 0.106                           |
| 12       | 0.029                           | <LOQ                            | 0.054                           | 0.043                           | 0.070                           | 0.072                           |
| 24       | 0.022                           | <LOQ                            | 0.046                           | 0.038                           | 0.065                           | 0.037                           |
| 48       | <LOQ                            | <LOQ                            | 0.025                           | <LOQ                            | <LOQ                            | 0.024                           |
| 72       | <LOQ                            | <LOQ                            | <LOQ                            | <LOQ                            | <LOQ                            | <LOQ                            |
| 96       | <LOQ                            | <LOQ                            | <LOQ                            | <LOQ                            | <LOQ                            | <LOQ                            |
| Milk     |                                 |                                 |                                 |                                 |                                 |                                 |
| 0.5      | 0.149                           | <LOQ                            | 1.120                           | 0.273                           | 0.464                           | 0.193                           |
| 1        | 0.149                           | <LOQ                            | 0.921                           | 0.396                           | 0.351                           | 0.186                           |
| 3        | 0.175                           | <LOQ                            | 0.736                           | 0.901                           | 0.275                           | 0.235                           |
| 6        | 0.248                           | <LOQ                            | 0.788                           | 0.711                           | 0.450                           | 0.438                           |
| 9        | 0.228                           | 0.035                           | 1.175                           | 0.313                           | 0.452                           | 0.243                           |
| 12       | 0.275                           | 0.037                           | 1.292                           | 0.442                           | 0.453                           | 0.275                           |
| 24       | 0.135                           | <LOQ                            | 0.879                           | 0.135                           | 0.391                           | 0.237                           |
| 48       | 0.175                           | <LOQ                            | 0.483                           | 0.057                           | 0.293                           | 0.146                           |
| 72       | 0.093                           | <LOQ                            | 0.324                           | 0.062                           | 0.115                           | 0.066                           |
| 96       | 0.034                           | <LOQ                            | 0.176                           | 0.047                           | 0.072                           | 0.052                           |

<LOQ – below limit of quantification.
